# Supplementary material for: Sarcopenia, frailty and cachexia patients detected in a multisystem electronic health record database
Source: PubMed Central journal article supplement (PMC7395344; doi:10.1186/s12891-020-03522-9), 2020-07-31
Supplement: 12891_2020_3522_MOESM1_ESM.pdf [file 12891_2020_3522_MOESM1_ESM.pdf]

**Supplemental Table 1. Comparing cases with text terms only (without ICD codes) versus those with ICD codes.** Continuous variables are listed as median (1<sup>st</sup>, 3<sup>rd</sup> quartiles) with p value by Wilcoxon signed rank test. Categorical variables are listed as n (%) with odds ratio, its 95% CI and p value by conditional logistic regression.

|                                                                                                | <b>Cases with Text terms only (no ICD codes)</b> | <b>Cases with ICD codes</b> | <b>Odds ratio (95% CI)</b> | <b>P value</b>  |
|------------------------------------------------------------------------------------------------|--------------------------------------------------|-----------------------------|----------------------------|-----------------|
| <b>n</b>                                                                                       | 8285                                             | 1309                        |                            |                 |
| <b>Age</b>                                                                                     | 75.7 (63.2, 85.1)                                | 68.8 (58.3, 82.1)           |                            | <0.0001         |
| <b>Female</b>                                                                                  | 4937 (60%)                                       | 726 (55%)                   |                            | 0.0048          |
| <b>Race</b>                                                                                    |                                                  |                             |                            | P value <0.0001 |
| <b>African American</b>                                                                        | 780 (9%)                                         | 201 (15%)                   |                            |                 |
| <b>White</b>                                                                                   | 5759 (70%)                                       | 840 (64%)                   |                            |                 |
| <b>Other</b>                                                                                   | 1746 (21%)                                       | 268 (20%)                   |                            |                 |
| <b>BMI, kg/m<sup>2</sup> (n= 6868 cases without ICD codes and 1084 cases having ICD codes)</b> | 22.5 (19.4, 26.6)                                | 19.2 (16.8, 22.6)           |                            | <0.0001         |
| <b>Diabetes with complication</b>                                                              | 1118 (13.5)                                      | 129 (9.9)                   | 1.43 (1.18, 1.73)          | 0.0003          |
| <b>Diabetes without complications</b>                                                          | 2148 (25.9)                                      | 264 (20.2)                  | 1.39 (1.20, 1.60)          | <0.0001         |
| <b>Hypertension</b>                                                                            | 5158 (63.5)                                      | 751 (57.4)                  | 1.29 (1.15, 1.45)          | <0.0001         |
| <b>Cardiovascular disease</b>                                                                  | 5864 (70.8)                                      | 905 (69.1)                  | 1.08 (0.95, 1.23)          | 0.2259          |
| <b>Peripheral vascular disease</b>                                                             | 1570 (19.0)                                      | 239 (18.3)                  | 1.05 (0.90, 1.22)          | 0.5521          |
| <b>Chronic kidney disease stages 3-5</b>                                                       | 1890 (22.8)                                      | 252 (19.3)                  | 1.24 (1.07, 1.44)          | 0.0040          |
| <b>Chronic kidney disease stage 4</b>                                                          | 570 (6.88)                                       | 66 (5.0)                    | 1.39 (1.07, 1.81)          | 0.0130          |
| <b>Chronic kidney disease stage 5 or End stage kidney disease</b>                              | 402 (4.9)                                        | 60 (4.6)                    | 1.06 (0.80, 1.40)          | 0.6733          |
| <b>Any malignancy</b>                                                                          | 2487 (30.0)                                      | 436 (33.3)                  | 0.86 (0.76, 0.97)          | 0.0163          |
| <b>Liver disease</b>                                                                           | 859 (10.4)                                       | 152 (11.6)                  | 0.88 (0.73, 1.06)          | 0.1732          |
| <b>Depression</b>                                                                              | 1189 (14.4)                                      | 207 (15.8)                  | 0.89 (0.76, 1.05)          | 0.1632          |
| <b>AIDS</b>                                                                                    | 53 (0.6)                                         | 49 (3.7)                    | 0.17 (0.11, 0.25)          | <0.0001         |
| <b>Neurologic conditions</b>                                                                   | 5337 (64.4)                                      | 868 (66.3)                  | 0.92 (0.81, 1.04)          | 0.1831          |
| <b>Fractures (excludes fingers, toes, craniofacial)</b>                                        | 926 (11.2)                                       | 168 (12.8)                  | 0.85 (0.72, 1.02)          | 0.0796          |
| <b>Osteoporosis</b>                                                                            | 1239 (15.0)                                      | 262 (20.0)                  | 0.70 (0.61, 0.82)          | <0.0001         |
| <b>Charlson comorbidity index value</b>                                                        | 3 (1, 6)                                         | 4 (2, 7)                    |                            | 0.0066          |
| <b>Charlson comorbidity index &gt; 2</b>                                                       | 4890 (59.0)                                      | 810 (61.9)                  | 0.88 (0.79, 1.00)          | 0.0505          |
| <b>Selected Medications post-index</b>                                                         |                                                  |                             |                            |                 |
| <b>Glucocorticoids</b>                                                                         | 1013 (12.2)                                      | 187 (14.3)                  | 0.84 (0.71, 0.99)          | 0.0364          |
| <b>Dronabinol</b>                                                                              | 47 (0.6)                                         | 22 (1.7)                    | 0.33 (0.20, 0.56)          | <0.0001         |
| <b>Megestrol</b>                                                                               | 72 (0.9)                                         | 21 (1.6)                    | 0.54 (0.33, 0.88)          | 0.0116          |
| <b>Caloric Supplement</b>                                                                      | 26 (0.31)                                        | 4 (0.31)                    | 1.03 (0.36, 2.95)          | 0.9604          |
| <b>Testosterone</b>                                                                            | 11 (0.1)                                         | 3 (0.2)                     | 0.58 (0.16, 2.08)          | 0.4247          |
