# Supplementary material for: Sarcopenia, frailty and cachexia patients detected in a multisystem electronic health record database
Source: PubMed Central journal article supplement (PMC7395344; doi:10.1186/s12891-020-03522-9), 2020-07-31
Supplement: 12891_2020_3522_MOESM3_ESM.pdf [file 12891_2020_3522_MOESM3_ESM.pdf]

**Supplemental Table 3:** ICD-9 and 10 codes used in the study

| <b>Key Condition Codes</b>                   | <b>ICD-9</b>                                                                                                  | <b>ICD-10</b>                                                                                                                                                                                                                                                                     |
|----------------------------------------------|---------------------------------------------------------------------------------------------------------------|-----------------------------------------------------------------------------------------------------------------------------------------------------------------------------------------------------------------------------------------------------------------------------------|
| Sarcopenia                                   | No ICD-9 code available                                                                                       | M62.84                                                                                                                                                                                                                                                                            |
| Cachexia                                     | 799.4                                                                                                         | R64                                                                                                                                                                                                                                                                               |
| Frailty                                      | 797                                                                                                           | R54                                                                                                                                                                                                                                                                               |
| <b>Osteoporosis and fracture codes</b>       |                                                                                                               |                                                                                                                                                                                                                                                                                   |
| Fracture codes                               | 733.1-733.16, 733.19, 805-808, 812-813, 818-821, 823, 827-828                                                 | M80.00XD, M80.88XA, S02.2XXA, S22.060A-S22.43XG, S32.00A-S32.592A, S42.002A-S42.441D, S52.001D-S52.692A, S62.308D, S62.633A, S72.001A-S72.91XA, S82.102D-S82.92XD, S92.312A-S92.511A                                                                                              |
| Osteopenia and Osteoporosis                  | 733.0-733.03, 733.09, 733.9, 733.90                                                                           | M80.x-M81.x                                                                                                                                                                                                                                                                       |
| <b>Charlson comorbidity score components</b> |                                                                                                               |                                                                                                                                                                                                                                                                                   |
| AIDS/HIV                                     | 042.x-044.x                                                                                                   | B20.x-B22.x, B24.x                                                                                                                                                                                                                                                                |
| Any Malignancy                               | 140.x-172.x, 174.x-195.8, 200.x-208.x, 238.6                                                                  | C00.x-C26.x, C30.x-C34.x, C37.x-C41.x, C43.x, C45.x-C58.x, C60.x-C76.x, C81.x-C85.x, C88.x, C90.x-C97.x                                                                                                                                                                           |
| Cerebrovascular disease                      | 362.34, 430.x-438.x                                                                                           | G45.x, G46.x, H34.0, I60.x-I69.x                                                                                                                                                                                                                                                  |
| Chronic Pulmonary Disease                    | 290.x, 294.1, 331.2                                                                                           | I27.8, I27.9, J40.x-J47.x, J60.x-J67.x, J68.4, J70.1, J70.3                                                                                                                                                                                                                       |
| Congestive Heart Failure                     | 398.91, 402.01, 402.11, 402.91, 404.01, 404.03, 404.11, 404.13, 404.91, 404.93, 425.4-425.9, 428.x            | I09.9, I11.0, I13.0, I13.2, I25.5, I42.0, I42.5-I42.9, I43.x, I50.x, P29.0                                                                                                                                                                                                        |
| Dementia                                     | 290.x, 294.1, 331.2                                                                                           | F00.x-F03.x, F05.1, G30.x, G31.1                                                                                                                                                                                                                                                  |
| Diabetes (and Complications)                 | 250.0-250.3, 250.8, 250.9, 250.4-250.7                                                                        | E10.0, E10.1, E10.6, E10.8, E10.9, E11.0, E11.1, E11.6, E11.8, E11.9, E12.0, E12.1, E12.6, E12.8, E12.9, E13.0, E13.1, E13.6, E13.8, E13.9, E14.0, E14.1, E14.6, E14.8, E14.9, E10.2-E10.5, E10.7, E11.2-E11.5, E11.7, E12.2-E12.5, E12.7, E13.2-E13.5, E13.7, E14.2-E14.5, E14.7 |
| Hemiplegia or Paraplegia                     | 334.1, 342.x, 343.x, 344.0-344.6, 344.9                                                                       | G04.1, G11.4, G80.1, G80.2, G81.x, G82.x, G83.0-G83.4, G83.9                                                                                                                                                                                                                      |
| Metastatic Solid Tumor                       | 196.x-199.x                                                                                                   | C77.x-C80.x                                                                                                                                                                                                                                                                       |
| Mild Liver Disease                           | 070.22, 070.23, 070.32, 070.33, 070.44, 070.54, 070.6, 070.9, 570.x, 571.x, 573.3, 573.4, 573.8, 573.9, V42.7 | B18.x, K70.0-K70.3, K70.9, K71.3-K71.5, K71.7, K73.x, K74.x, K76.0, K76.2-K76.4, K76.8, K76.9, Z94.4                                                                                                                                                                              |
| Moderate or Severe Liver Disease             | 456.0-456.2, 572.2-572.8                                                                                      | I85.0, I85.9, I86.4, I98.2, K70.4, K71.1, K72.1, K72.9, K76.5, K76.6,                                                                                                                                                                                                             |

|                                          |                                                                                                                                                                                                                                                                                                                                                                                                                                                                                                                                                                                                                                                                                                                                                                                  |                                                                                                                                                                                                                                                                                                                                                                                                                                                                                                                                                                                                                                                                                                                                                                                                                            |
|------------------------------------------|----------------------------------------------------------------------------------------------------------------------------------------------------------------------------------------------------------------------------------------------------------------------------------------------------------------------------------------------------------------------------------------------------------------------------------------------------------------------------------------------------------------------------------------------------------------------------------------------------------------------------------------------------------------------------------------------------------------------------------------------------------------------------------|----------------------------------------------------------------------------------------------------------------------------------------------------------------------------------------------------------------------------------------------------------------------------------------------------------------------------------------------------------------------------------------------------------------------------------------------------------------------------------------------------------------------------------------------------------------------------------------------------------------------------------------------------------------------------------------------------------------------------------------------------------------------------------------------------------------------------|
| Myocardial Infarction                    | 410.x, 412.x                                                                                                                                                                                                                                                                                                                                                                                                                                                                                                                                                                                                                                                                                                                                                                     | K76.7                                                                                                                                                                                                                                                                                                                                                                                                                                                                                                                                                                                                                                                                                                                                                                                                                      |
| Peptic Ulcer Disease                     | 531.x–534.x                                                                                                                                                                                                                                                                                                                                                                                                                                                                                                                                                                                                                                                                                                                                                                      | I21.x, I22.x, I25.2                                                                                                                                                                                                                                                                                                                                                                                                                                                                                                                                                                                                                                                                                                                                                                                                        |
| Peripheral Vascular Disease              | 093.0, 437.3, 440.x,<br>441.x,443.1–443.9, 47.1,<br>557.1,557.9, V43.4                                                                                                                                                                                                                                                                                                                                                                                                                                                                                                                                                                                                                                                                                                           | K25.x–K28.x                                                                                                                                                                                                                                                                                                                                                                                                                                                                                                                                                                                                                                                                                                                                                                                                                |
| Renal Disease                            | 403.01, 403.11, 403.91,<br>404.02,404.03, 404.12,<br>404.13,404.92, 404.93,<br>582.x,583.0–583.7, 585.x,<br>586.x,588.0, V42.0, V45.1,<br>V56.x                                                                                                                                                                                                                                                                                                                                                                                                                                                                                                                                                                                                                                  | I70.x, I71.x, I73.1, I73.8, I73.9,<br>I77.1, I79.0, I79.2, K55.1, K55.8,<br>K55.9, Z95.8, Z95.9                                                                                                                                                                                                                                                                                                                                                                                                                                                                                                                                                                                                                                                                                                                            |
| Rheumatologic Disease                    | 446.5, 710.0–710.4, 714.0–<br>714.2, 714.8, 725.x                                                                                                                                                                                                                                                                                                                                                                                                                                                                                                                                                                                                                                                                                                                                | I12.0, I13.1, N03.2–N03.7, N05.2–<br>N05.7, N18.x, N19.x, N25.0, Z49.0–<br>Z49.2, Z94.0, Z99.2                                                                                                                                                                                                                                                                                                                                                                                                                                                                                                                                                                                                                                                                                                                             |
| <b>Additional comorbidities included</b> |                                                                                                                                                                                                                                                                                                                                                                                                                                                                                                                                                                                                                                                                                                                                                                                  |                                                                                                                                                                                                                                                                                                                                                                                                                                                                                                                                                                                                                                                                                                                                                                                                                            |
| Depression                               | 311                                                                                                                                                                                                                                                                                                                                                                                                                                                                                                                                                                                                                                                                                                                                                                              | M05.x, M06.x, M31.5, M32.x–<br>M34.x, M35.1, M35.3, M36.0                                                                                                                                                                                                                                                                                                                                                                                                                                                                                                                                                                                                                                                                                                                                                                  |
| Hypertension                             | 401-405                                                                                                                                                                                                                                                                                                                                                                                                                                                                                                                                                                                                                                                                                                                                                                          | F32.x-F33.x                                                                                                                                                                                                                                                                                                                                                                                                                                                                                                                                                                                                                                                                                                                                                                                                                |
| Neurologic Conditions                    | 294.8, 294.9, 299.01, 299.11,<br>312.9, 314.01, 331.11,<br>331.19, 331.81, 352.9,<br>434.01, 434.11, 435.9,<br>780.09, 780.93, 784.3,<br>784.69, 191.6, 191.9, 192.2,<br>194.3, 225.2, 237.5, 237.70,<br>270.0, 270.1, 271.0, 272.7,<br>275.1, 277.5, 279.49, 294.20<br>299.x, 307.23, 307.81, 311,<br>317, 318.x, 319, 322.9,<br>323.9, 324.1, 327.x, 330.x,<br>334.x, 335.x, 336.x, 339.00,<br>340, 341.x, 342.90, 343.9,<br>345.x, 346.x, 347.x, 348.2<br>348.30, 350.10, 351.0,<br>351.8, 354.0, 355.9, 356.x,<br>357.x, 358.x, 359.x, 368.2<br>368.9, 374.30, 377.x, 386.11,<br>723.1, 724.2, 728.x, 729.x,<br>741.90, 759.7, 759.83, 759.89<br>759.9, 779.0, 780.x, 781.x,<br>783.42, 784.x, 787.20,<br>799.59,<br>852.20, 853.00, 854.00,<br>854.10, V17.89, V18.9, V5883 | I10, I11.x, I13.x, I15.x, I16.x<br>C71.6, C71.9, C72.0, C75.1, D32.9,<br>D49.6, D89.89, E11.42, E70.0,<br>E70.1, E72.x, E75.x, E76.x, E83.01,<br>F03.90, F04, F09, F32.9, F70, F71,<br>F72, F73, F79, F84.5, F84.8, F90.9,<br>F91.9, F95.2, F95.9, G03.9,<br>G04.90, G04.91, G06.1, G10,<br>G11.x, G12.x, G20, G21.9, G23.1,<br>G24.x, G25.x, G30.9, G31.x, G35,<br>G36.0, G37.9, G40.x, G43.x, G44.x,<br>G45.9, G47.x,<br>G50.0, G51.0, G51.8, G52.9,<br>G56.00, G58.9<br>G60.x, G61.x, G62.89, G63, G70.x-<br>G73.x, G80.9<br>G81.90, G90.9, G93.x, G95.x,<br>H02.409, H46.9, H47.x, H53.x,<br>H81.13, I63.9, M54.x, M60.9,<br>M62.x,<br>M79.x, P90, Q05.9, Q85.00, Q87.x,<br>Q89.x, Q99.2, R13.10, R25.x.<br>R26.9, R27.0, R29.898, R41.x,<br>R47.x,<br>R48.x, R51, R55, R56.x, R62.0,<br>S06.x, Z51.81, Z82.69, Z84.81 |
| Other Cardiovascular Disease             | 390.x-399.x, 400.x-409.x,<br>410.x-430.x, 432.x-433.x,<br>440.x-459.x                                                                                                                                                                                                                                                                                                                                                                                                                                                                                                                                                                                                                                                                                                            | I01.x, I02.x, I05.x, I06.x, I07.x,<br>I08.x, I09.x, I11.9, I12.9, I13.x,<br>I15.x, I16.x, I20.x, I23.x-I28.x, I30.x-<br>I39.x, I40.x-I49.x, I51.x-I52.x, I72.x-<br>I75.x, I77.x-I79.x, I80.x, I82.x-189.x,<br>I95.x, I97.x-I98.x                                                                                                                                                                                                                                                                                                                                                                                                                                                                                                                                                                                           |
